# Supplementary material for: 3D deconvolution of human skin immune architecture with Multiplex Annotated Tissue Imaging System
Source: PubMed Central journal article supplement (PMC10246893; doi:10.1126/sciadv.adf9491), 2023-06-07
Supplement: sciadv.adf9491_sm.pdf [file sciadv.adf9491_sm.pdf]

Supplementary Materials for  
**3D deconvolution of human skin immune architecture with Multiplex  
Annotated Tissue Imaging System**

Manon Scholaert *et al.*

Corresponding author: Nicolas Gaudenzio, [nicolas.gaudenzio@inserm.fr](mailto:nicolas.gaudenzio@inserm.fr)

*Sci. Adv.* **9**, eadf9491 (2023)  
DOI: 10.1126/sciadv.adf9491

**The PDF file includes:**

Figs. S1 to S6  
Tables S1 to S4  
Legend for movie S1

**Other Supplementary Material for this manuscript includes the following:**

Movie S1

## Supplementary Figures and legends

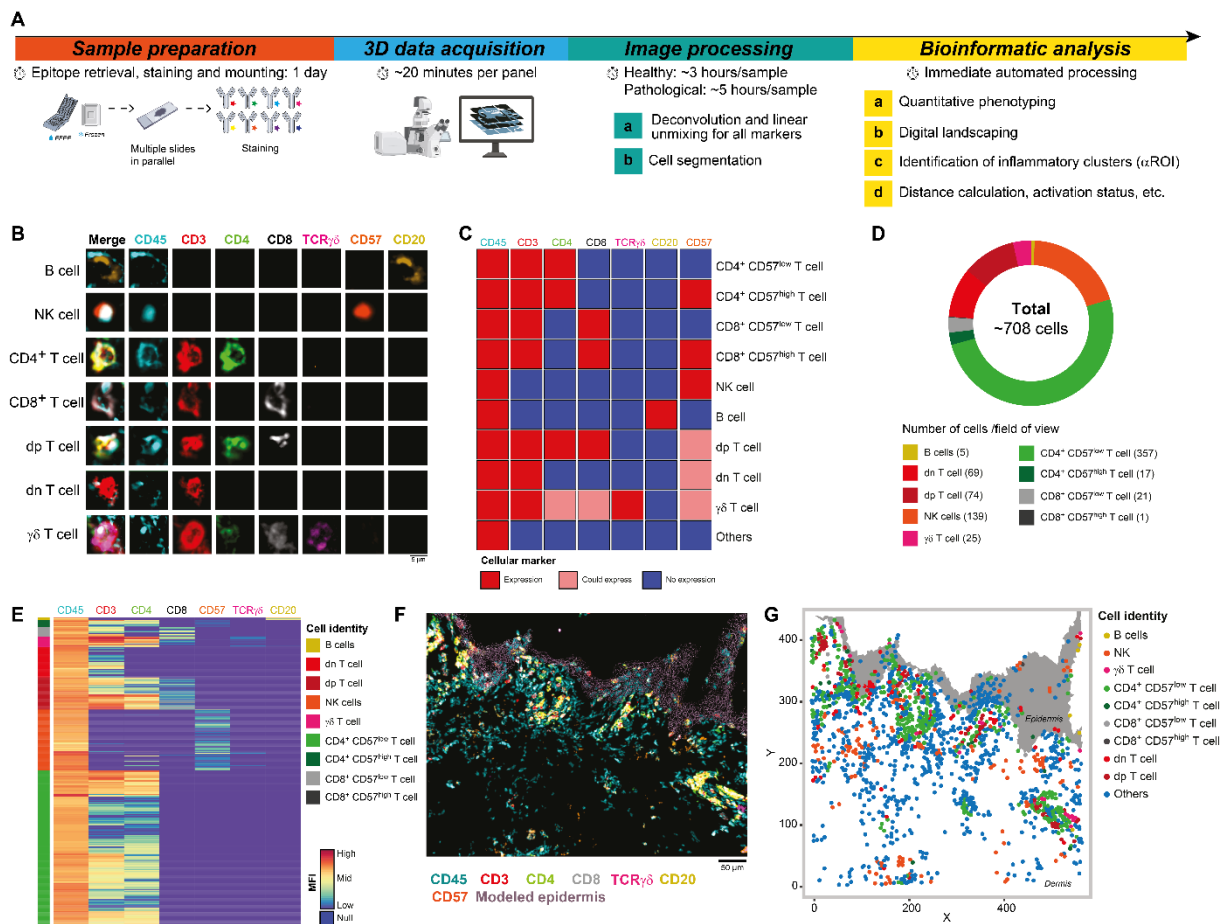

**Figure S1. Main lymphoid cell populations annotated using MANTIS algorithm. A,** Timeline of the MANTIS analytic pipeline. **B,** Examples of single-cell staining of all used biomarkers in identified lymphoid cells. Scale bar: 5  $\mu\text{m}$ . **C,** MANTIS attribution matrix for the lymphoid panel. **D,** Tissue annotation and cell proportion of diseased skin (SLE patient). **E,** Heatmap of mean fluorescence intensity levels of used markers in identified lymphoid cells (colored scale). **F,G,** Representative 3-D confocal multiplex image (F) and associated digital map generated with MANTIS (G) of the lymphoid panel in diseased (SLE) skin. Scale bar: 50  $\mu\text{m}$ .

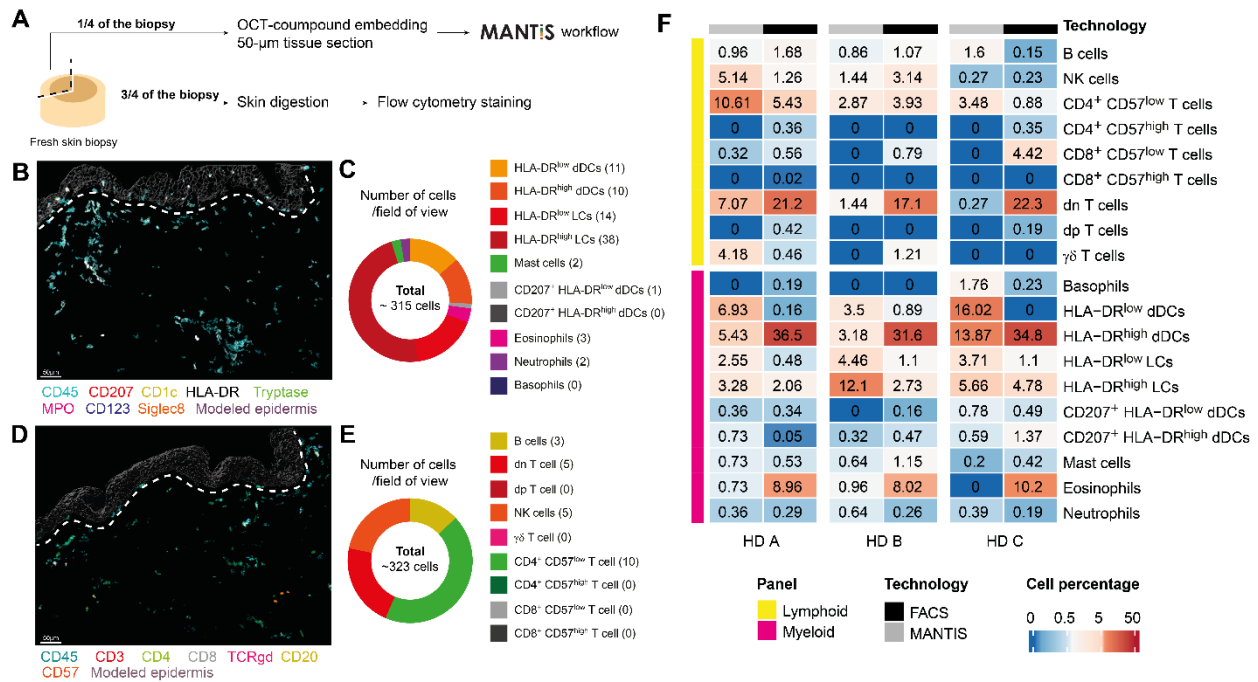

**Figure S2. MANTIS and flow cytometry methods show similar proportions of immune cells, except HLA-DR<sup>high</sup> dDCs, eosinophils and double-negative T cells.** A, MANTIS versus flow cytometry results comparison. A 23 mm-diameter human skin biopsy was cut into two pieces. One fourth of the biopsy was embedded in OCT, 50 $\mu$ m sections were generated and the slides were analyzed using the MANTIS pipelines previously described (myeloid and lymphoid panels). The three fourth remaining of the biopsy were digested, the resulting cell suspension was stained with the same lymphoid and myeloid panels and a flow cytometry analysis was performed. B,C, Representative 3-D confocal multiplex images of pre-designed MANTIS myeloid panel (B) and tissue annotation using MANTIS pipeline (C) of healthy skin. D,E, Representative 3-D confocal multiplex images of pre-designed MANTIS lymphoid panel (D) and tissue annotation using MANTIS pipeline (E) of healthy skin. F, Representative heatmap of lymphoid and myeloid cell proportions using MANTIS and flow cytometry methods on 3 different donors in logarithmic scale. Scale bar: 50  $\mu$ m. *FACS: Fluorescence Activated Cell Sorting.*

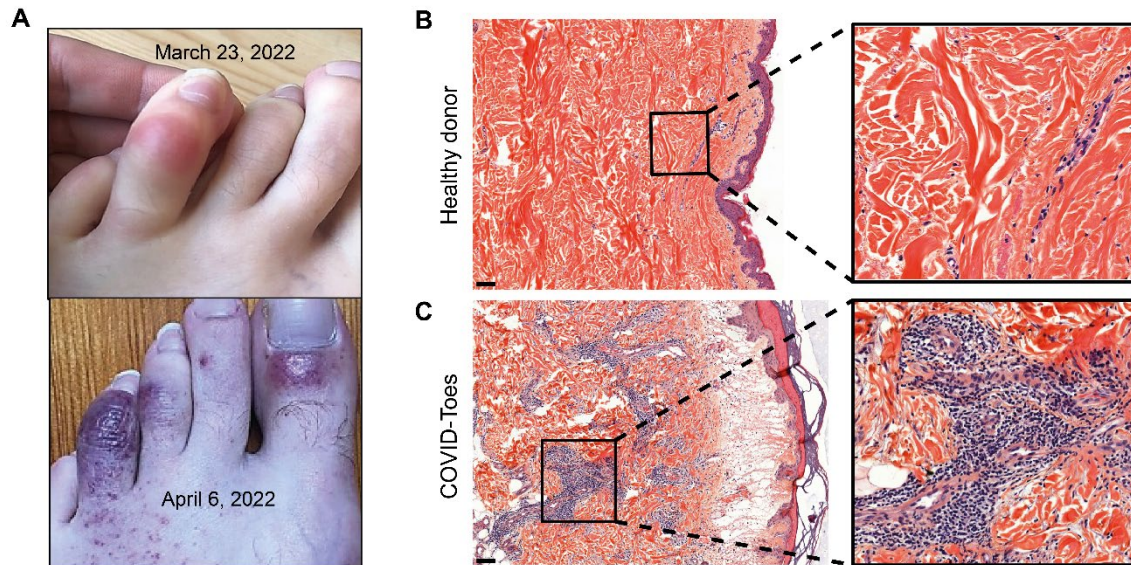

**Figure S3. COVID-toes and associated histology.** A, Evolution of a chilblain-like lesion in a COVID patient between March 2022 (upper panel) and April 2022 (lower panel). B, C, Comparison of H&E staining of a healthy-looking skin sample (B), and a chilblain-like lesion associated with COVID (COVID-T=toes), showing immune infiltrates (C). Scale bar: 100 $\mu$ m.

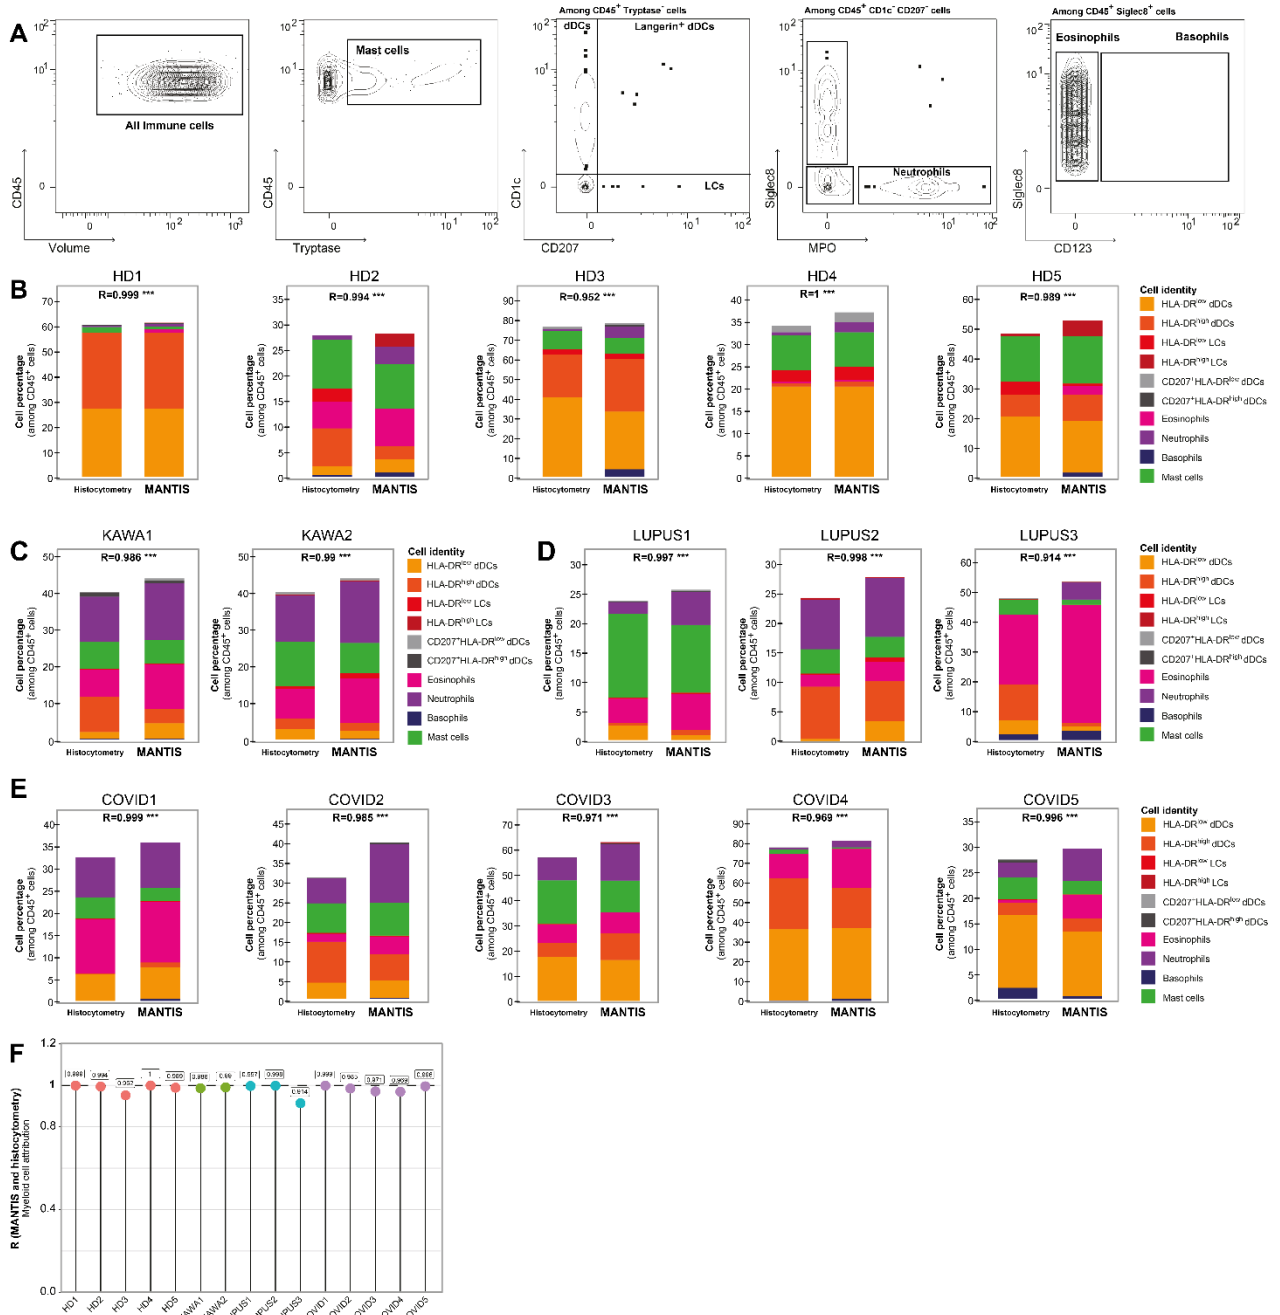

**Figure S4. Quantitative validation of MANTIS myeloid tissue annotation with classical histo-cytometry.** **A**, Gating strategies of identified myeloid cell populations using FlowJo. **B-E**, Comparison of cell type percentages using classical histo-cytometry or MANTIS and associated Pearson correlation coefficient in healthy skin (**B**) and Kawasaki (**C**), SLE (**D**) and COVID-toes (**E**) lesions. \*\*\*P<0.001, Pearson correlation test. **F**, Lollipop chart of Pearson correlation coefficients of all samples comparing histo-cytometry and MANTIS cell attribution.

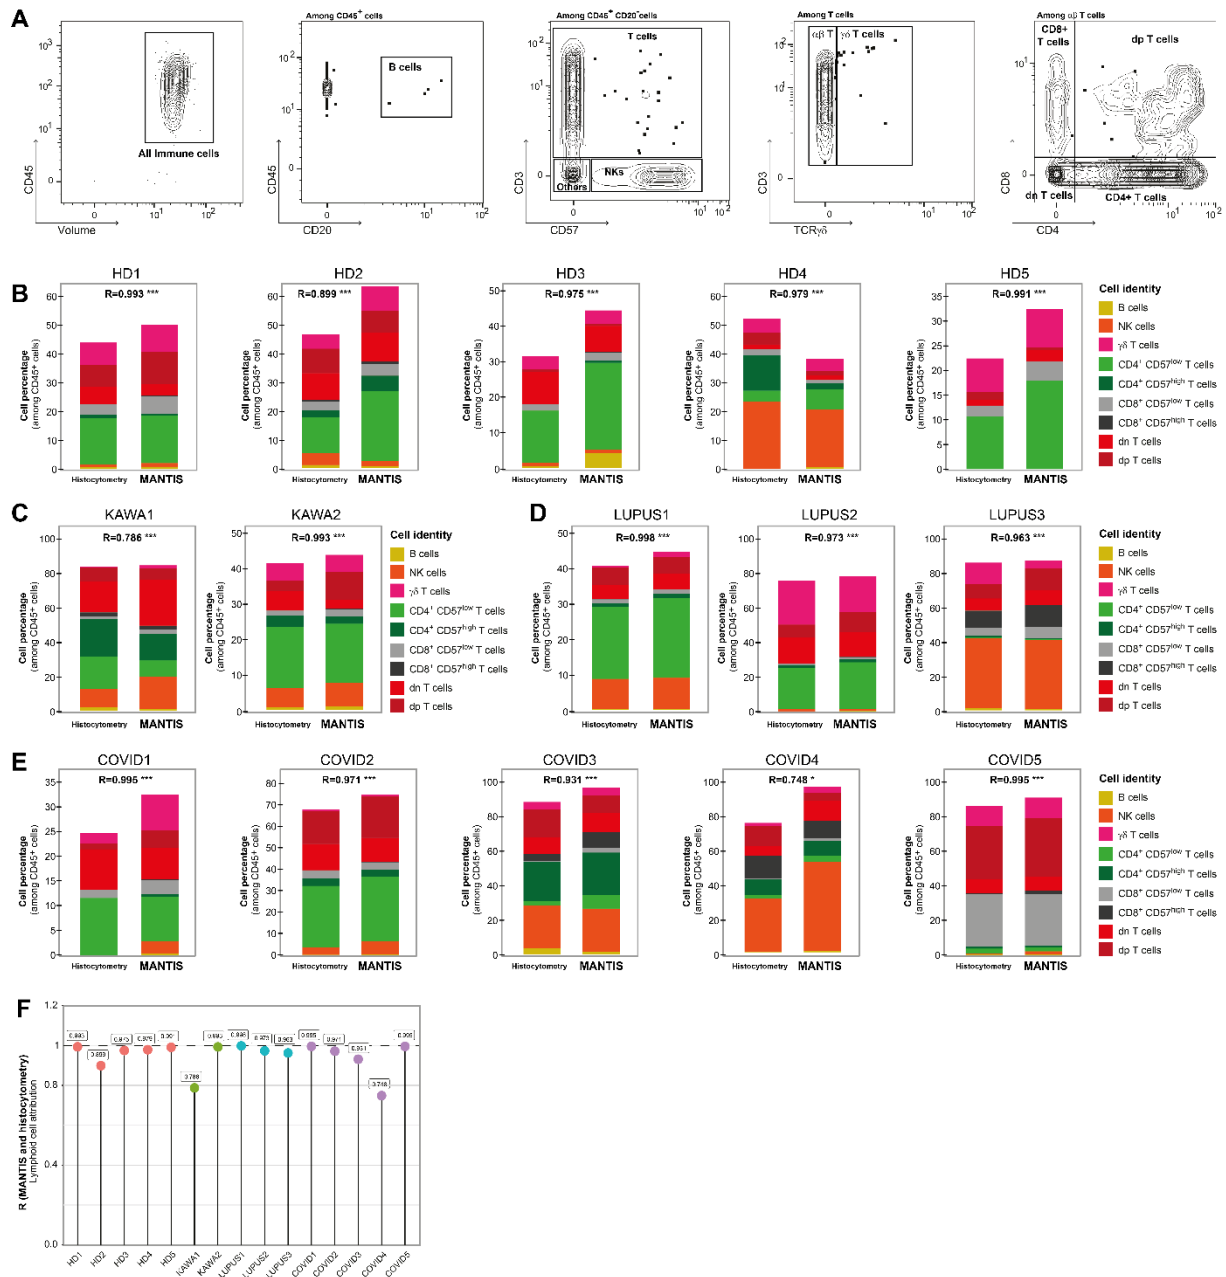

**Figure S5. Quantitative validation of MANTIS lymphoid tissue annotation with classical histo-cytometry.** **A**, Gating strategies of identified lymphoid cell populations using FlowJo. **B-E**, Comparison of cell type percentages using classical histo-cytometry or MANTIS and associated Pearson correlation coefficient in healthy skin (**B**) and Kawasaki (**C**), SLE (**D**) and COVID-toes (**E**) lesions. \* $P < 0.05$  \*\*\* $P < 0.001$ , Pearson correlation test. **F**, Lollipop chart of Pearson correlation coefficients of all samples comparing histo-cytometry and MANTIS cell attribution.

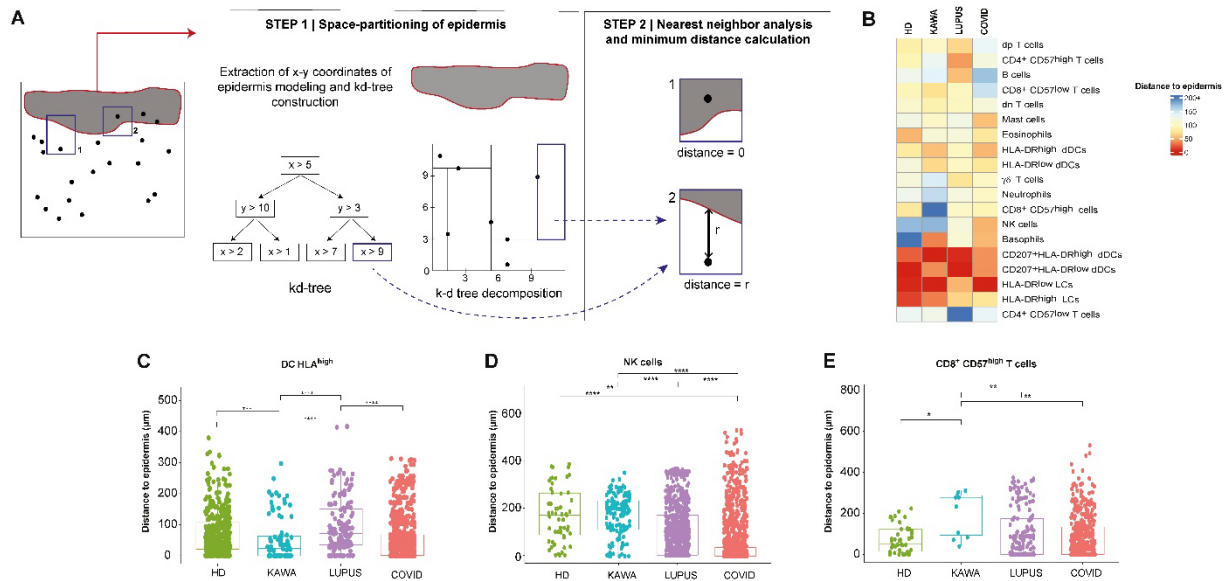

**Figure S6. 3-D spatial distribution of immune cells and structural elements is computed using MANTIS.** **A**, Quick nearest neighbor computation using KD-tree space-partitioning.  $xy$  coordinates of the epidermis were stored based on tree decision, using KD-Tree. Nearest neighbor search using KD-Tree point storage was then computed for each detected cell, and the minimal distance was calculated. **B**, Heatmap of mean distance to epidermis (colored scale) per cell type in healthy and pathological skin. **C-E**, Mean distance to epidermis (in  $\mu\text{m}$ ) of dDC HLA<sup>high</sup> (C), NK cells (D) and CD8<sup>+</sup> CD57<sup>high</sup> T cells (E) in healthy and pathological skin. Mean  $\pm$  SEM; \* $P < 0.05$ , \*\* $P < 0.01$ , \*\*\* $P < 0.001$  One-way ANOVA.



## Supplementary Tables and legends

| Antibody              | Clone      | Fluorochrome                                                               | Concent. | Reference                    |
|-----------------------|------------|----------------------------------------------------------------------------|----------|------------------------------|
| CD45                  | HI30       | AF-532                                                                     | 0.12 µg  | Thermofisher, #58-0459-42    |
| <b>Lymphoid panel</b> |            |                                                                            |          |                              |
| CD4                   | N1UG0      | Unconjugated<br><i>Revealed with anti-mouse AF488</i>                      | 10 µg/ml | eBioscience™, #14-2444-82    |
| CD3                   | Polyclonal | Unconjugated<br><i>Revealed with anti-rabbit AF594</i>                     | 10 µg/ml | Agilent, #A045229-2          |
| CD20                  | 2H7        | APC-Cy7                                                                    | 20 µg/ml | Biolegend, #302313           |
| TCR-γδ                | B1         | BV650                                                                      | 15 µg/ml | BD, #564156                  |
| CD8a                  | AMC908     | eFluor 660                                                                 | 10 µg/ml | Thermofisher, #50-0008-80    |
| CD57                  | TB01       | eFluor 450                                                                 | 10 µg/ml | Thermofisher, #48-0577-41    |
| <b>Myeloid panel</b>  |            |                                                                            |          |                              |
| Siglec8               | Polyclonal | Unconjugated<br><i>Revealed with anti-rabbit AF405</i>                     | 1:50     | Thermofisher, #PA5-110774    |
| CD1c                  | L161       | Zenon AF488 Using Zenon Mouse IgG1 labeling kit (Thermofisher, #Z25000)    | 10 µg/ml | Biolegend, #331502           |
| Tryptase              | AA1        | Zenon AF647<br>Using Zenon Mouse IgG1 labeling kit (Thermofisher, #Z25000) | 1:50000  | Abcam, #ab2378               |
| CD207                 | 923B7      | AF546                                                                      | 5µg/ml   | Biotechne, #DDX0373A546      |
| MPO                   | Polyclonal | Unconjugated<br><i>Revealed with anti-goat-AF594</i>                       | 5 µg/ml  | Biotechne, #AF3667           |
| HLA                   | L243       | AF700                                                                      | 10 µg/ml | Biotechne, #NB100-77855AF700 |
| CD123                 | 6H6        | SB645                                                                      | 1 µg     | eBioscience™, #64-1239-42    |

**Table S1. Key resources.** Classical and available unconjugated and conjugated antibodies were used in this study at indicated concentrations.



| Antibody              | Fluorochrome | Excitation laser (nm) | Laser power (%) | Detector type | Detection window |
|-----------------------|--------------|-----------------------|-----------------|---------------|------------------|
| CD45                  | AF-532       | 532                   | 6               | HyD           | 535-578 nm       |
| <b>Lymphoid panel</b> |              |                       |                 |               |                  |
| CD4                   | AF488        | 488                   | 2.7             | HyD           | 503-539 nm       |
| CD3                   | AF594        | 552                   | 6               | HyD           | 603-633 nm       |
| CD20                  | APC-Cy7      | 635                   | 50              | PMT           | 740-790 nm       |
| TCR-gd                | BV650        | 405                   | 10              | HyD           | 624-682 nm       |
| CD8a                  | eFluor 660   | 635                   | 67.2            | HyD           | 651-693 nm       |
| CD57                  | eFluor 450   | 405                   | 10              | HyD           | 415-479 nm       |
| <b>Myeloid panel</b>  |              |                       |                 |               |                  |
| Siglec8               | AF405        | 405                   | 3.67            | HyD           | 409-470 nm       |
| CD1c                  | AF488        | 488                   | 1               | HyD           | 505-536 nm       |
| Tryptase              | AF647        | 635                   | 89.5            | HyD           | 648-689 nm       |
| CD207                 | AF546        | 552                   | 4               | HyD           | 558-588 nm       |
| MPO                   | AF594        | 552                   | 2.04            | HyD           | 608-633 nm       |
| HLA                   | AF700        | 635                   | 50              | PMT           | 699-782 nm       |
| CD123                 | SB645        | 405                   | 3.97            | HyD           | 625-681 nm       |

**Table S2. Microscope configuration of MANTIS acquisitions.** Between-stack acquisition parameters were configured using all available four lasers in visible range wavelengths and detectors (Hybrid [HyD] or photomultiplier [PMT]).

**Table S3. All datasets corresponding to the myeloid panel.** Single cell databases (.csv file) of all healthy samples and patients used to generate the presented data are available in the non-profit repository Dryad (doi:10.5061/dryad.rxdbrvdm).

**Table S4. All datasets corresponding to the lymphoid panel.** Single cell databases (.csv file) of all healthy samples and patients used to generate the presented data are available in the non-profit repository Dryad (doi:10.5061/dryad.rxdbrvdm).

**Video S1. Example of MANTIS user interface.** This video shows the gating possibilities on the software interface and associated single cell quantitative analyzes of biomarkers.
